1 **Bat coronavirus phylogeography in the Western Indian Ocean**

2 Léa Joffrin <sup>a#</sup>, Steven M. Goodman <sup>b,c</sup>, David A. Wilkinson <sup>a</sup>, Beza Ramasindrazana <sup>a,b\*</sup>, Erwan  
3 Lagadec <sup>a</sup>, Yann Gomard <sup>a</sup>, Gildas Le Minter <sup>a</sup>, Andréa Dos Santos <sup>d</sup>, M. Corrie Schoeman <sup>e</sup>,  
4 Rajendraprasad Sookhareea <sup>f</sup>, Pablo Tortosa <sup>a</sup>, Simon Julienne <sup>g</sup>, Eduardo S. Gudo <sup>h</sup>, Patrick  
5 Mavingui <sup>a</sup> and Camille Lebarbenchon <sup>a#</sup>

6 <sup>a</sup> Université de La Réunion, UMR Processus Infectieux en Milieu Insulaire Tropical (PIMIT),  
7 INSERM 1187, CNRS 9192, IRD 249, Sainte-Clotilde, La Réunion, France.

8 <sup>b</sup> Association Vahatra, Antananarivo, Madagascar.

9 <sup>c</sup> Field Museum of Natural History, Chicago, USA.

10 <sup>d</sup> Veterinary Faculty, Eduardo Mondlane University, Maputo, Mozambique.

11 <sup>e</sup> School of Life Sciences, University of Kwa-Zulu Natal, Kwa-Zulu Natal, South Africa.

12 <sup>f</sup> National Parks and Conservation Service, Réduit, Mauritius.

13 <sup>g</sup> Seychelles Ministry of Health, Victoria, Mahe, Seychelles.

14 <sup>h</sup> Instituto Nacional de Saúde, Maputo, Mozambique.

15

16 **Running head:** Bat coronavirus in the Western Indian Ocean

17

18 #Corresponding authors: [lea.joffrin@gmail.com](mailto:lea.joffrin@gmail.com); [camille.lebarbenchon@univ-reunion.fr](mailto:camille.lebarbenchon@univ-reunion.fr)

19 UMR PIMIT, 2 rue Maxime Rivière, 97490 Sainte-Clotilde, Reunion Island, France.

20

21 \*Present address: Beza Ramasindrazana, Institut Pasteur de Madagascar, BP 1274, Amba-  
22 tofotsikely, Antananarivo 101, Madagascar

23

24 **Abstract word count:** 171 **Manuscript word count:** 3158

25 **Author Contributions:** CL and LJ conceived and designed the study. BR, CL, DAW, EL, LJ,  
26 PT, SMG and YG collected biological material on Madagascar. SMG, RS and YG collected  
27 biological material on Mauritius. BR, EL and GLM, collected biological material on Mayotte.  
28 SMG, GLM, ADS and MCS, collected biological material in Mozambique. BR, DAW, EL and  
29 GLM collected biological material on Reunion Island. EL, GLM, SJ and YG collected biolog-  
30 ical material in the Seychelles. LJ performed the molecular analyses. CL, DAW, and LJ ana-  
31 lyzed the data. CL and LJ wrote the paper. SMG, ESG, PM and SJ contributed to the project  
32 management in Malagasy, Mauritian, Seychelles, Mozambican, and French institutions. All au-  
33 thors edited, read, and approved the final manuscript.

34

### 35 **Abstract**

36 Bats provide key ecosystem services such as crop pest regulation, pollination, seed dispersal,  
37 and soil fertilization. Bats are also major hosts for biological agents responsible for zoonoses,  
38 such as coronaviruses (CoVs). The islands of the Western Indian Ocean are identified as a major  
39 biodiversity hotspot, with more than 50 bat species. In this study, we tested 1,013 bats belonging  
40 to 36 species from Mozambique, Madagascar, Mauritius, Mayotte, Reunion Island and Sey-  
41 chelles, based on molecular screening and partial sequencing of the RNA-dependent RNA pol-  
42 ymerase gene. In total, 88 bats (8.7%) tested positive for coronaviruses, with higher prevalence  
43 in Mozambican bats ( $20.5\% \pm 4.9\%$ ) as compared to those sampled on islands ( $4.5\% \pm 1.5\%$ ).  
44 Phylogenetic analyses revealed a large diversity of  $\alpha$ - and  $\beta$ -CoVs and a strong signal of co-  
45 evolution between CoVs and their bat host species, with limited evidence for host-switching,  
46 except for bat species sharing day roost sites.

47

### 48 **Importance**

49 This is the first study to report the presence of coronaviruses (CoVs) in bats in Mayotte,  
50 Mozambique and Reunion Island, and in insectivorous bats in Madagascar. Eight percent of the  
51 tested bats were positive for CoVs, with higher prevalence in continental Africa than on islands.  
52 A high genetic diversity of  $\alpha$ - and  $\beta$ -CoVs was found, with strong association between bat host  
53 and virus phylogenies, supporting a long history of co-evolution between bats and their associ-  
54 ated CoVs in the Western Indian Ocean. These results highlight that strong variation between  
55 islands does exist and is associated with the composition of the bat species community on each  
56 island. Future studies should investigate whether CoVs detected in these bats have a potential  
57 for spillover in other hosts.

58

59

60

61 **Keywords:** bat, coronavirus, islands, tropical, evolution, ecology

62 **Text – 3158 words**

63 **Introduction**

64 The burden of emerging infectious diseases has significantly increased over the last decades  
65 and is recognized as a major global health concern. In 2018, the World Health Organization  
66 (WHO) established the “Blueprint priority disease list”, identifying viruses such as Ebola, Lassa  
67 fever, Middle East Respiratory Syndrome (MERS), and Nipah fever as significant threats to  
68 international biosecurity<sup>1</sup>. This list also highlights the potential pandemic risk from the emer-  
69 gence of currently unknown zoonotic pathogens, collectively referring to these unknown threats  
70 as “disease X”<sup>1</sup>. Investigation of the potential zoonotic pathogens in wild animals, particularly  
71 vertebrates, is thus critical for emerging infectious disease preparedness and responses.

72 Bats represent nearly 1,400 species and live on all continents except Antarctica<sup>2</sup>. They  
73 provide key ecosystem services such as crop pest regulation, pollination, seed dispersal, and  
74 soil fertilization<sup>3–10</sup>. Bats are also recognized as reservoirs of many zoonotic pathogens, includ-  
75 ing coronaviruses (CoVs)<sup>11–13</sup>. Indeed, several CoVs originating from bats have emerged in  
76 humans and livestock with sometimes major impacts to public health. For instance, in 2003, the  
77 Severe Acute Respiratory Syndrome (SARS) CoV emerged in humans, after spillover from bats  
78 to civets<sup>14–18</sup>, and led to the infection of 8,096 people and 774 deaths in less than a year<sup>19</sup>.

79 Our study area spans geographic locations across the islands of the Western Indian  
80 Ocean and southeastern continental Africa (SECA) (Figure 1). These islands have diverse ge-  
81 ological origins that have influenced the process of bat colonization and species distributions  
82<sup>20</sup>. The ecological settings and species diversity on these islands for bats are notably different.  
83 On Madagascar, more than 45 bat species are known to occur, of which more than 80 % are  
84 endemic to the island<sup>21–23</sup>. The smaller studied islands of the Western Indian Ocean, Mauritius,  
85 Mayotte, Reunion Island, and Mahé (Seychelles), host reduced bat species diversity (e.g. three

86 species on Reunion Island), whereas SECA supports a wide range of bat species. To date, sev-  
87 eral studies have identified bat-infecting CoVs in countries of continental Africa, including  
88 Zimbabwe<sup>24</sup>, South Africa<sup>25,26</sup>, Namibia<sup>27</sup>, and Kenya<sup>28,29</sup>. CoVs have also been reported in  
89 fruit bats (Pteropodidae) in Madagascar, where  $\beta$ -coronaviruses belonging to the D-subgroup  
90 were identified in *Eidolon dupreanum* and *Pteropus rufus*<sup>30</sup>.

91 In this study, we investigated the presence of CoVs in over 1,000 individual bats be-  
92 longing to 36 species, sampled on five islands (Madagascar, Mauritius, Mayotte, Reunion Is-  
93 land, and Mahé) and one continental area (Mozambique). Based on molecular screening and  
94 partial sequencing of the RNA-dependent RNA polymerase gene, we (i) estimated CoV preva-  
95 lence in the regional bat populations, (ii) assessed CoV genetic diversity, and (iii) identified  
96 associations between bat families and CoVs, as well as potential evolutionary drivers leading  
97 to these associations.

98

## 99 **Results**

### 100 **Prevalence of CoV**

101 A total of 1,013 bats were tested from Mozambique, Mayotte, Reunion Island, Sey-  
102 chelles, Mauritius and Madagascar (Figure 1). In total, 88 of the 1,013 bat samples tested pos-  
103 itive for CoV by Real-Time PCR (mean detection rate: 8.7%). The prevalence of positive bats  
104 was different according to the sampling locations ( $\chi^2 = 77.0$ ,  $df = 5$ ;  $p < 0.001$ ), with a higher  
105 prevalence in Mozambique ( $\pm 95\%$  confidence interval:  $20.5\% \pm 4.9\%$ ) than on all Western  
106 Indian Ocean islands ( $4.5\% \pm 1.5\%$ ) (Figure 2). A significant difference in the prevalence of  
107 positive bats was also detected between families ( $\chi^2 = 44.8$ ,  $df = 8$ ;  $p < 0.001$ ; Supplementary  
108 Figure S1). The highest prevalence were observed in the families Nycteridae ( $28.6\% \pm 23.6\%$ )  
109 and Rhinolophidae ( $26.2\% \pm 11.0\%$ ). Bat species had a significant effect on the probability of

110 CoVs detection ( $\chi^2 = 147.9$ ,  $df = 39$ ;  $p < 0.001$ ; Supplementary Figure S2). Finally, the preva-  
111 lence of CoV positive bats in Mozambique was significantly different ( $N = 264$ ,  $\chi^2 = 22.8$ ,  $df =$   
112  $1$ ;  $p < 0.001$ ; Supplementary Figure S3) between February ( $37.4\% \pm 9.9\%$ ) and May ( $11.6\% \pm$   
113  $4.8$ ).

114

### 115 **RdRp sequence diversity**

116 Of the 88 positive samples, we obtained 77 partial RdRp sequences using the Real-Time  
117 PCR detection system (179 bp) and 51 longer partial RdRp sequences using a second PCR  
118 system (440 bp). Sequences generated with the second system were subsequently used for phy-  
119 logenetic analyses. Details of the sequenced CoV-positive samples are provided in Supplemen-  
120 tary Table S1. Pairwise comparison of these 51 sequences revealed 28 unique sequences, and  
121 sequences similarities ranging from 60.2% to 99.8%. The lowest sequence similarity was found  
122 in Mozambique (60.2% to 99.8%), then in Madagascar (64.0% to 99.8%). No genetic variation  
123 was observed for samples from Mayotte and Reunion Island.

124

### 125 **Phylogenetic structure of CoVs**

126 Sequence comparison indicated that Western Indian Ocean bats harbor a high diversity  
127 of both  $\alpha$  and  $\beta$ -CoVs, with conserved groups clustering mostly by bat family (Figure 3). Spe-  
128 cifically, 25 sequences were identified as  $\alpha$ -CoVs, and three sequences were genetically related  
129 to the  $\beta$ -CoVs. For  $\alpha$ -CoVs, all sequences detected in our tested Molossidae formed a highly  
130 supported monophyletic group, including CoV sequences from Molossidae bats previously de-  
131 tected in continental Africa (Figure 4). CoVs detected in *Mops condylurus* (Mozambique), *Mor-*  
132 *mopterus francoismoutoui* (Reunion Island), *Chaerephon pusillus* and *Chaerephon* sp. (Ma-  
133 yotte), and *Mormopterus jugularis* (Madagascar) shared 90% - 98% nucleotide similarity with

134 a CoV detected in *Chaerephon* sp. in Kenya (Supplementary Table S2). All CoVs found in  
135 Miniopteridae clustered in a monophyletic group, including Miniopteridae CoVs sequences  
136 from Africa, Asia, and Oceania (Supplementary Table S2). The great majority of  $\alpha$ -CoVs de-  
137 tected in Rhinolophidae bats clustered in two monophyletic groups (Figure 3); one with African  
138 Rhinolophidae CoVs and one with Asian Rhinolophidae CoVs. We also detected one CoV from  
139 *Rhinolophus rhodesiae*, which was 100% similar to a Miniopteridae CoV from this study. Rhi-  
140 nonycteridae CoVs formed a single monophyletic group with NL63 Human CoVs. The Rhi-  
141 nonycteridae CoVs detected clustered with NL63-related bat sequences found in *Triaenops afer*  
142 in Kenya (Figure 5) and showed 85% similarity to NL63 Human CoVs (Supplementary Table  
143 S2). Hipposideridae  $\alpha$ -CoVs mainly clustered into a single monophyletic group, including 229E  
144 Human CoV-related bat sequence found in *Hipposideros vittatus* from Kenya (Figure 6; Sup-  
145 plementary Table S2).

146 For  $\beta$ -CoVs, two sequences obtained from *Nycteris thebaica* clustered in the C-sub-  
147 group together with other CoVs previously reported in African *Nycteris* sp. bats (Figure 7). The  
148 sequences showed 88% nucleotide identity to a  $\beta$ -C CoV found in *Nycteris gambiensis* in Ghana  
149 (Supplementary Table S2). *Rousettus madagascariensis* CoVs clustered with Pteropodidae  
150 CoVs belonging to the D-subgroup of  $\beta$ -CoVs (Figure 8). BLAST queries against the NCBI  
151 database showed 98% nucleotide identity between CoV sequences from *Rousettus madagasca-*  
152 *riensis* and a  $\beta$ -D CoV sequence detected in *Eidolon helvum* from Kenya (Supplementary Table  
153 S2).

154

### 155 **Co-phylogeny between bats and CoVs**

156 Co-phylogeny tests were conducted using 11 Cyt *b* sequences obtained from the 11  
157 CoVs positive bat species and 27 partial CoV RdRp sequences (440 bp). Results supported co-

158 evolution between the Western Indian Ocean bats and their CoVs (ParaFitGlobal = 0.04;  $p =$   
159 0.001) and a high level of phylogenetic congruence (Figure 9).

160

## 161 **Discussion**

162 We provide evidence for a high diversity of CoVs in bats on Western Indian Ocean islands.  
163 The overall prevalence of CoV positive bats was consistent with studies from continental Africa  
164 <sup>25</sup> and from islands in the Australasian region <sup>31</sup>, although we detected significant variation in  
165 the prevalence of infected bats, according to their family, species, sampling location and season.  
166 Our study is nevertheless affected by the strong heterogeneity of bat communities in the island  
167 of the Western Indian Ocean, in particular in term of species richness. The high CoV genetic  
168 diversity detected in bats from Mozambique and Madagascar is likely to be associated with the  
169 higher bat species diversity in the African mainland and in Madagascar, has compared to small  
170 oceanic islands <sup>20</sup>. In addition, CoV prevalence in bat populations may significantly vary across  
171 seasons, as found in Mozambique with higher prevalence during the wet season than in the dry  
172 season. Several studies on bat CoV have indeed shown significant variations in the temporal  
173 infection dynamic of CoV in bats, potentially associated with bat parturition <sup>32-34</sup>.

174 Host specificity is well known for some bat CoVs subgenera <sup>35-37</sup>. For example,  $\beta$ -C CoVs  
175 are largely associated with Vespertilionidae, whereas  $\beta$ -D CoVs are found mostly in Pteropodi-  
176 dae <sup>36,38</sup>. In our study, we showed that Western Indian Ocean bats harbor phylogenetically struc-  
177 tured CoVs, of both  $\alpha$ -CoV and  $\beta$ -CoV subclades, clustering mostly by bat family. In the new  
178 CoV taxonomy based on full genomes proposed by the International Committee of Taxonomy  
179 of Viruses (ICTV),  $\alpha$ -CoVs and  $\beta$ -CoVs are split in subgenera mostly based on host families <sup>39</sup>,  
180 reflected in the subgenera names (e.g. Rhinacovirus for a Rhinolophidae  $\alpha$ -CoV cluster, Min-



181 uacovirus for a Miniopteridae  $\alpha$ -CoV cluster, Hibecovirus for an Hipposideridae  $\beta$ -CoV clus-  
182 ter). Although our classification was based on a partial sequence of the RdRp region, we iden-  
183 tified sequences from samples belonging to four of these subgenera (Minuacovirus, Duvina-  
184 covirus, Rhinacovirus, and Nobecovirus) and three that could not be classified according to this  
185 taxonomic scheme hence representing unclassified subgenera (we propose “Molacovirus”,  
186 “Nycbecovirus”, and “Rhinacovirus2”).

187 A strong geographical influence on CoVs diversity, with independent evolution of CoVs on  
188 each island, was expected in our study, because of spatial isolation and endemism of the tested  
189 bat species. Anthony et al.<sup>38</sup> found that the dominant evolutionary mechanism for African CoVs  
190 was host switching. Congruence between host and viral phylogenies however suggests a strong  
191 signal for co-evolution between Western Indian Ocean bats and their associated CoVs. Geo-  
192 graphical influence seems to occur within bat families, as for Molossidae. Endemism resulting  
193 from geographic isolation may thus have played a role in viral diversification within bat fami-  
194 lies.

195 Although co-evolution could be the dominant mechanism in the Western Indian Ocean,  
196 host-switching may take place in certain situations. For example, in Mozambique, we found a  
197 potential Miniopteridae  $\alpha$ -CoV in a Rhinolophidae bat co-roosting with Miniopteridae in the  
198 same cave. These host-switching events could be favored when several bat species roost in  
199 syntopy<sup>40</sup>. A similar scenario was described in Australia where Miniopteridae  $\alpha$ -CoV was de-  
200 tected in Rhinolophidae bats<sup>31</sup>. These infrequent host-switching events show that spillovers  
201 can happen but suggest that viral transmission is not maintained in the receiver host species.  
202 The host-virus co-evolution might thus have resulted in strong adaptation of CoVs to each bat  
203 host species. In addition, viral factors (mutation rate, recombination propensity, replication abil-  
204 ity in the cytoplasm, changes in the ability to bind host cells), environmental factors (climate

205 variation, habitat degradation, decrease of bat preys), and phylogenetic relatedness of host spe-  
206 cies are also critical for the viral establishment in a novel host <sup>41-44</sup>. Nevertheless, apparent  
207 evidence of host switching as a dominant mechanism of CoV evolution could be an artifact of  
208 a lack of data for some potential bat hosts, leading to incomplete phylogenetic reconstructions  
209 <sup>38</sup>.

210 Several bat CoVs we identified in Rhinonycteridae and Hipposideridae from Mozambique  
211 had between 85% and 93% nucleotide sequence similarity with NL63 Human CoVs and 229E  
212 Human CoVs, respectively. These two human viruses are widely distributed in the world and  
213 associated with mild to moderate respiratory infection in humans <sup>45</sup>. Tao et al. established that  
214 the NL63 Human CoVs and 229E Human CoVs have a zoonotic recombinant origin from their  
215 most recent common ancestor, estimated to be about 1,000 years ago <sup>46</sup>. During the past decade,  
216 they were both detected in bats in Kenya, and in Ghana, Gabon, Kenya, and Zimbabwe, respec-  
217 tively <sup>24,28,47,48</sup>. Intermediate hosts are important in the spillover of CoVs, despite major  
218 knowledge gaps on the transmission routes of bat infectious agents to secondary hosts <sup>49</sup>. This  
219 hypothesis has been formulated for the 229E Human CoV, with an evolutionary origin in Hip-  
220 posideridae bats and with camelids as intermediate hosts <sup>48</sup>. The ancient spillover of NL63 from  
221 Rhinonycteridae bats to humans might have occurred through a currently unidentified interme-  
222 diate host <sup>28,50,51</sup>. Because receptor recognition by viruses is the first essential cellular step to  
223 infect host cells, CoVs may have spilt over into humans from bats through an intermediate host  
224 possibly due to mutations on spike genes <sup>13,28</sup>. Further investigations of CoVs in Kenyan and  
225 Mozambican livestock and hunted animals could potentially provide information on the com-  
226 plete evolutionary and emergence history of these two viruses before their establishment in  
227 humans.

228 MERS-like CoV, with high sequence similarity (>85%) to human and camel strains of  
229 MERS-CoV, have been detected in *Neoromicia capensis* in South Africa and *Pipistrellus cf.*  
230 *hesperidus* in Uganda, suggesting a possible origin of camel MERS-CoV in vespertilionid bats  
231 <sup>25,38,52</sup>. This family has been widely studied, with 30% of all reported bat CoVs sequences from  
232 the past 20 years coming from vespertilionids <sup>53</sup>. No members of this family were positive for  
233 CoV in our study, which may be associated with the low number of individuals tested; addi-  
234 tional material is needed to explore potential MERS-like CoV in the Western Indian Ocean, in  
235 particular on Madagascar.

236 Knowledge on bat CoV ecology and epidemiology has significantly increased during the  
237 past decade. Anthony et al. estimated that there might be at least 3,204 bat CoVs worldwide <sup>38</sup>;  
238 however, direct bat-to-human transmission has not been demonstrated so far. As for most  
239 emerging zoonoses, CoV spillover and emergence may be associated to human activities and  
240 ecosystem changes such as habitat fragmentation, agricultural intensification and bushmeat  
241 consumption. The role of bats as epidemiological reservoir of infectious agents needs to be  
242 balanced with such human driven modifications on ecosystem functioning, in order to properly  
243 assess bat-borne CoV emergence risks.

244

## 245 **Materials and methods**

### 246 **Origin of the tested samples**

247 Samples obtained from vouchered bat specimens during previous studies in Mozam-  
248 bique (February and May 2015), Mayotte (November to December 2014), Reunion Island (Feb-  
249 ruary 2015), Seychelles (February to March 2014), Mauritius (November 2012) and Madagas-  
250 car (October to November 2014) were tested <sup>54-57</sup> (Supplementary Information). We also col-

251 lected additional swab samples from several synanthropic bat species on Madagascar, in Janu-  
252 ary 2018 (Supplementary Information). Details on sample types, bat families, species, and lo-  
253 cations are provided in Supplementary Table S3.

254

## 255 **Ethical statement**

256 The ethical terms of these research protocols were approved by the CYROI Institu-  
257 tional Animal Care and Use Committee (Comité d’Ethique du CYROI no.114, IACUC certi-  
258 fied by the French Ministry of Higher Education, of Research and Innovation). All protocols  
259 strictly followed the terms of research permits and regulations for the handling of wild mam-  
260 mals and were approved by licencing authorities (Supplementary Information).

261

## 262 **Molecular detection**

263 RNA was extracted from 140  $\mu$ L of each sample using the QIAamp Viral RNA mini kit  
264 (QIAGEN, Valencia, California, USA), and eluted in 60  $\mu$ L of Qiagen AVE elution buffer. For  
265 bat organs, approximately 1 mm<sup>3</sup> of tissue (either lungs or intestines) was placed in 750  $\mu$ L of  
266 DMEM medium and homogenized in a TissueLyser II (Qiagen, Hilden, Germany) for 2 min at  
267 25 Hz using 3 mm tungsten beads, prior to the RNA extraction. Reverse transcription was per-  
268 formed on 10  $\mu$ L of RNA using the ProtoScript II Reverse Transcriptase and Random Primer 6  
269 (New England BioLabs, Ipswich, MA, USA) under the following thermal conditions: 70 °C for  
270 5 min, 25 °C for 10 min, 42 °C for 50 min, and 65 °C for 20 min<sup>58</sup>. cDNAs were tested for the  
271 presence of the RNA-dependent RNA-polymerase (RdRp) gene using a multi-probe Real-Time  
272 PCR<sup>59</sup>. The primer set with Locked Nucleic Acids (LNA; underlined position in probe se-  
273 quences) was purchased from Eurogentec (Seraing, Belgium): 11-FW: 5'-TGA-TGA-TGS-  
274 NGT-TGT-NTG-YTA-YAA-3' and 13-RV: 5'-GCA-TWG-TRT-GYT-GNG-ARC-ARA-

275 ATT-C-3'. Three probes were used: probe I (ROX): 5'-TTG-TAT-TAT-CAG-AAT-GGY-  
276 GTS-TTY-AT-3', probe II (FAM): 5'-TGT-GTT-CAT-GTC-WGA-RGC-WAA-ATG-TT-3',  
277 and probe III (HEX): 5'-TCT-AAR-TGT-TGG-GTD-GA-3'. Real-Time PCR was performed  
278 with ABSolute Blue QPCR Mix low ROX 1X (Thermo Fisher Scientific, Waltham, MA, USA)  
279 and 2.5  $\mu$ L of cDNA under the following thermal conditions: 95 °C for 15 min, 95 °C for 30 s,  
280 touchdowns from 56 °C to 50°C for 1 min and 50 cycles with 95 °C for 30 s and 50 °C for 1  
281 min in a CFX96 Touch Real-Time PCR Detection System (Bio-Rad, Hercules, CA, USA).

282 Because of the limited size of sequences generated from the Real-Time PCR, a second  
283 PCR targeting 440 bp of the RdRp gene was performed with 5  $\mu$ L of cDNA of each positive  
284 sample, with the following primer set: IN-6: 5'-GGT-TGG-GAC-TAT-CCT-AAG-TGT-GA-  
285 3' and IN-7: 5'-CCA-TCA-TCA-GAT-AGA-ATC-ATC-ATA-3'<sup>60</sup>. PCRs were performed  
286 with the GoTaq G2 Hot Start Green Master Mix (Promega, Madison, WI, USA) in an Applied  
287 Biosystems 2720 Thermal Cycler (Thermo Fisher Scientific, Waltham, MA, USA), under the  
288 following thermal conditions: 95 °C for 2 min, 45 cycles with 95 °C for 1 min, 54 °C for 1 min,  
289 72°C for 1 min, and a final elongation step at 72°C for 10 min. After electrophoresis in a 1.5%  
290 agarose gel stained with 2% GelRed (Biotium, Hayward, CA, USA), amplicons of the expected  
291 size were sequenced on both strands by Genoscreen (Lille, France). All generated sequences  
292 were deposited in GenBank under the accession numbers MN183146 to MN183273.

293

## 294 **Statistical analysis**

295 We have performed Pearson  $\chi^2$  tests on all samples (1,013 bats) to explore the effect of  
296 (i) location, (ii) bat family, and (iii) bat species on the detection of coronavirus RNA. Two  
297 sampling campaigns, at two different season, in the same location, were available for Mozam-  
298 bique. We thus investigated the effect of the sampling season, between the wet (February) and

299 dry (May) season, on CoV detection in Mozambique in 2015 (264 bats). Analyses were con-  
300 ducted with R v3.5.1 software <sup>61</sup>.

301

## 302 **Phylogenetic analyses**

303 Sequences obtained with the second PCR system <sup>60</sup> were edited with the Chromas Lite  
304 Software package version 2.6.4 <sup>62</sup>. We explored CoV diversity of the sequences with pairwise  
305 identity values obtained from *seqidentity* function in R *bio3d* package v2.3-4 <sup>63</sup> and identified  
306 the most similar CoV RdRp sequences referenced in GenBank using BLASTN 2.2.29+. An  
307 alignment was then generated using the 51 nucleotide sequences obtained in this study and 151  
308 reference CoV sequences representing a large diversity of hosts and geographic origins (Eu-  
309 rope, Asia, Oceania, America and Africa), with CLC Sequence viewer 8.0 Software (CLC Bio,  
310 Aarhus, Denmark). A phylogenetic tree was obtained by maximum likelihood using MEGA  
311 Software v10.0.4 <sup>64</sup>, with 1,000 bootstrap iterations, and with the best evolutionary model for  
312 our dataset as selected by modelgenerator v0.85 <sup>65</sup>.

313 Host-virus associations were investigated using the phylogeny of Western Indian Ocean  
314 bats and their associated CoVs. Bat phylogeny was generated from an alignment of 1,030 bp of  
315 mitochondrial Cytochrome *b* (Cyt *b*) gene sequences (Supplementary Table S4), for each CoV  
316 positive bat species. Finally, bat and pruned CoV phylogenies based on each 393 bp RdRp  
317 unique sequence fragment were generated by Neighbor-Joining with 1,000 bootstrap iterations,  
318 using CLC Sequence viewer 8.0 Software (CLC Bio, Aarhus, Denmark)<sup>66</sup>. Phylogenetic con-  
319 gruence was tested to assess the significance of the coevolutionary signal between bat host  
320 species and CoVs sequences, using *ParaFit* with 999 permutations in the *ape* package v5.0 in  
321 R 3.5.1 <sup>67,68</sup>. Tanglegram representations of the co-phylogeny were visualized using the Jane  
322 software v4.01 <sup>69</sup>.

323

## 324 **Acknowledgments**

325 We are very grateful to S. Muradrasoli for recommendations on the optimization of the multi-  
326 probe PCR protocol as well as for providing PCR controls and to C. Cordonin for providing bat  
327 Cyt *b* sequences. L. Biscornet, C. Dionisio, L. Domergue, M. Dietrich, T. Mbohoahy, T.  
328 Nekena, J. Rakotoarivelo, M. Rakotomanga, C. F. Rakotondramanana, and A. Randrenjarison  
329 are thanked for their assistance in the field. We also thank S. Bos and A. Hoarau for their help  
330 in the laboratory, and K. Dellagi and H. Pascalis for the development and the management of  
331 the ‘partenariat Mozambique-Réunion dans la recherche en santé: pour une approche intégrée  
332 d’étude des maladies infectieuses à risque épidémique (MoZaR)’ research program.

333

## 334 **Competing interests**

335 The authors declare no competing interests.

## 336 **Data availability**

337 DNA sequences: Genbank accessions MN183146 to MN183273

338

## 339 **Funding**

340 Field research was funded by the ‘Pathogènes associés à la Faune Sauvage Océan Indien (FS-  
341 OI)’, the ‘Leptospirose Ocean Indien (LeptOI)’, the ‘Paramyxovirus Océan Indien (Para-  
342 myxOI)’, and the ‘Partenariat Mozambique-Réunion dans la recherche en santé : pour une ap-  
343 proche intégrée d’étude des maladies infectieuses à risque épidémique (MoZaR)’ programs  
344 (Fond Européen de Développement Régional, Programme Opérationnel de Coopération Terri-  
345 toriale). Fieldwork on Mayotte was funded by the ‘Centre National de la Recherche Scien-  
346 tifique’ (Projets Exploratoires Premier Soutien BATMAN). Molecular analyses were finan-  
347 cially supported by tutorship institutions of the UMR PIMIT. LJ is a recipient of a ‘Région  
348 Réunion, European Regional Development Funds (FEDER 2014-2020)’ PhD fellowship. BR’s  
349 post-doctoral fellowship was supported by the ‘Run Emerge’ European Union’s Seventh

350 Framework Program (FP7/2007–2013; Grant agreement NO 263958), the ‘Fonds de Coopé-  
351 ration Régionale, Prefecture de La Réunion’, and The Field Museum of Natural History, Chi-  
352 cago, through the Ralph and Marian Falk Medical Research Trust. CL is supported by a ‘Chaire  
353 mixte : Université de La Réunion – INSERM’. The funding agencies were not involved in the  
354 study design, implementation or publishing of this study, and the research presented herein  
355 represents the opinions of the authors but not necessarily the opinions of the funding agencies.

356

## 357 **References**

- 358 1. Reusken, C. *et al.* *WHO Research and Development Blueprint 2018 Annual review of*  
359 *diseases prioritized under the Research and Development Blueprint Informal consulta-*  
360 *tion.* [http://www.who.int/csr/research-and-development/documents/prioritizing\\_dis-](http://www.who.int/csr/research-and-development/documents/prioritizing_diseases_progress/en/)  
361 [eases\\_progress/en/](http://www.who.int/csr/research-and-development/documents/prioritizing_diseases_progress/en/) (2018).
- 362 2. American Society of Mammalogist. Chiroptera (ASM Mammal Diversity Database).  
363 [https://mammaldiversity.org/#Y2hpcm9wdGVyYSZnbG9iYWxfc2VhcmNoPXRyd-](https://mammaldiversity.org/#Y2hpcm9wdGVyYSZnbG9iYWxfc2VhcmNoPXRyd-WUmbG9vc2U9dHJlZQ)  
364 [WUmbG9vc2U9dHJlZQ](https://mammaldiversity.org/#Y2hpcm9wdGVyYSZnbG9iYWxfc2VhcmNoPXRyd-WUmbG9vc2U9dHJlZQ) (2019).
- 365 3. Muscarella, R. & Fleming, T. H. The role of frugivorous bats in tropical forest succes-  
366 sion. *Biol. Rev.* **82**, 573–590 (2007).
- 367 4. Kunz, T. H., Braun de Torrez, E., Bauer, D., Lobo, T. & Fleming, T. H. Ecosystem  
368 services provided by bats. *Ann. N. Y. Acad. Sci.* **1223**, 1–38 (2011).
- 369 5. Kasso, M. & Balakrishnan, M. Ecological and economic importance of bats (Order  
370 Chiroptera). *ISRN Biodivers.* **2013**, Article ID 187415 (2013).
- 371 6. Boyles, J. G., Cryan, P. M., McCracken, G. F. & Kunz, T. K. Economic importance of  
372 bats in agriculture. *Science* **332**, 41–42 (2011).
- 373 7. Kemp, J. *et al.* Bats as potential suppressors of multiple agricultural pests: A case study  
374 from Madagascar. *Agric. Ecosyst. Environ.* **269**, 88–96 (2019).



- 375 8. Jones, G., Jacobs, D. S., Kunz, T. H., Wilig, M. R. & Racey, P. A. Carpe noctem: The  
376 importance of bats as bioindicators. *Endangered Species Research* vol. 8 93–115  
377 (2009).
- 378 9. Russo, D., Bosso, L. & Ancillotto, L. Novel perspectives on bat insectivory highlight  
379 the value of this ecosystem service in farmland: Research frontiers and management  
380 implications. *Agric. Ecosyst. Environ.* **266**, 31–38 (2018).
- 381 10. Taylor, P. J., Grass, I., Alberts, A. J., Joubert, E. & Tschardtke, T. Economic value of  
382 bat predation services – A review and new estimates from macadamia orchards. *Eco-*  
383 *syst. Serv.* **30**, 372–381 (2018).
- 384 11. Sulkin, S. E. & Allen, R. Virus Infections in Bats. in *Monographs in Virology* (ed.  
385 Karger, S.) 3–7 (Basel, 1974).
- 386 12. Calisher, C. H., Childs, J. E., Field, H. E., Holmes, K. V. & Schountz, T. Bats: Im-  
387 portant reservoir hosts of emerging viruses. *Clin. Microbiol. Rev.* **19**, 531–545 (2006).
- 388 13. Cui, J., Li, F. & Shi, Z.-L. Origin and evolution of pathogenic coronaviruses. *Nat. Rev.*  
389 *Microbiol.* **17**, 181–192 (2019).
- 390 14. Guan, Y. *et al.* Isolation and characterization of viruses related to the SARS corona-  
391 virus from animals in Southern China. *Science* **302**, 276–279 (2003).
- 392 15. Kan, B. *et al.* Molecular evolution analysis and geographic investigation of Severe  
393 Acute Respiratory Syndrome coronavirus-like virus in palm civets at an animal market  
394 and on farms. *J. Virol.* **79**, 11892–11900 (2005).
- 395 16. Tu, C. *et al.* Antibodies to SARS coronavirus in civets. *Emerg. Infect. Dis.* **10**, 2244–  
396 2248 (2004).
- 397 17. Lau, S. K. P. *et al.* Severe acute respiratory syndrome coronavirus-like virus in Chinese  
398 horseshoe bats. *Proc. Natl. Acad. Sci.* **102**, 14040–14045 (2005).

- 399 18. Li, W. *et al.* Bats are natural reservoirs of SARS-like coronaviruses. *Science* **310**, 676–  
400 679 (2005).
- 401 19. World Health Organization. Summary of probable SARS cases with onset of illness  
402 from 1 November 2002 to 31 July 2003 Based on data as of the 31 December 2003.  
403 *World Health Organization* [https://www.who.int/csr/sars/country/table2004\\_04\\_21/en/](https://www.who.int/csr/sars/country/table2004_04_21/en/)  
404 (2003).
- 405 20. O’Brien, J. Bats of the Western Indian Ocean islands. *Animals* **1**, 259–290 (2011).
- 406 21. Goodman, S. M. *Les chauves-souris de Madagascar*. (Association Vahatra, 2011).
- 407 22. Goodman, S. M. & Ramasindrazana, B. Description of a new species of the *Miniopt-*  
408 *terus aelleni* group (Chiroptera: Miniopteridae) from upland areas of central and north-  
409 ern Madagascar. *Zootaxa* **3936**, 538–558 (2015).
- 410 23. Goodman, S. M. *et al.* An integrative approach to characterize Malagasy bats of the  
411 subfamily Vespertilioninae Gray, 1821, with the description of a new species of  
412 *Hypsugo*. *Zool. J. Linn. Soc.* **173**, 988–1018 (2015).
- 413 24. Bourgarel, M. *et al.* Circulation of alphacoronavirus, betacoronavirus and paramyxovi-  
414 rus in *Hipposideros* bat species in Zimbabwe. *Infect. Genet. Evol.* **58**, 253–257 (2018).
- 415 25. Ithete, N. L. *et al.* Close relative of human Middle East respiratory syndrome corona-  
416 virus in bat, South Africa. *Emerg. Infect. Dis.* **19**, 1697–1699 (2013).
- 417 26. Geldenhuys, M., Weyer, J., Nel, L. H. & Markotter, W. Coronaviruses in south african  
418 bats. *Vector-Borne Zoonotic Dis.* **13**, 516–519 (2013).
- 419 27. Müller, M. A. *et al.* Coronavirus antibodies in African bat species. *Emerg. Infect. Dis.*  
420 **13**, 1367–1370 (2007).
- 421 28. Tao, Y. *et al.* Surveillance of bat coronaviruses in Kenya identifies relatives of human  
422 coronaviruses NL63 and 229E and their recombination history. *J. Virol.* **91**, e01953-16

- 423 (2017).
- 424 29. Waruhiu, C. *et al.* Molecular detection of viruses in Kenyan bats and discovery of  
425 novel astroviruses, caliciviruses and rotaviruses. *Viol. Sin.* **32**, 101–114 (2017).
- 426 30. Razanajatovo, N. H. *et al.* Detection of new genetic variants of betacoronaviruses in  
427 endemic frugivorous bats of Madagascar. *Viol. J.* **12**, 42 (2015).
- 428 31. Smith, C. S. *et al.* Coronavirus infection and diversity in bats in the Australasian re-  
429 gion. *Ecohealth* **13**, 72–82 (2016).
- 430 32. Annan, A. *et al.* Human betacoronavirus 2c EMC/2012-related viruses in bats, Ghana  
431 and Europe. *Emerg. Infect. Dis.* **19**, 456–459 (2013).
- 432 33. Drexler, J. F. *et al.* Amplification of emerging viruses in a bat colony. *Emerg. Infect.*  
433 *Dis.* **17**, 449–456 (2011).
- 434 34. Wacharapluesadee, S. *et al.* Longitudinal study of age-specific pattern of coronavirus  
435 infection in Lyle’s flying fox (*Pteropus lylei*) in Thailand. *Viol. J.* **15**, 38 (2018).
- 436 35. Leopardi, S. *et al.* Interplay between co-divergence and cross-species transmission in  
437 the evolutionary history of bat coronaviruses. *Infect. Genet. Evol.* **58**, 279–289 (2018).
- 438 36. Cui, J. *et al.* Evolutionary relationships between bat coronaviruses and their hosts.  
439 *Emerg. Infect. Dis.* **13**, 1526–1532 (2007).
- 440 37. Drexler, J. F., Corman, V. M. & Drosten, C. Ecology, evolution and classification of  
441 bat coronaviruses in the aftermath of SARS. *Antiviral Res.* **101**, 45–56 (2014).
- 442 38. Anthony, S. J. *et al.* Global patterns in coronavirus diversity. *Virus Evol.* **3**, vex012  
443 (2017).
- 444 39. Ziebuhr, J. *et al.* *ICTV Report 2017.013S*. [https://talk.ictvonline.org/taxonomy/p/taxonomy-history?taxnode\\_id=201851846](https://talk.ictvonline.org/taxonomy/p/taxonomy-history?taxnode_id=201851846) (2017).
- 445
- 446 40. Luis, A. D. *et al.* A comparison of bats and rodents as reservoirs of zoonotic viruses:

- 447 are bats special? *Proc. R. Soc. B Biol. Sci.* **280**, 20122753 (2013).
- 448 41. Willoughby, A. R., Phelps, K. L. & Olival, K. J. A comparative analysis of viral rich-  
449 ness and viral sharing in cave-roosting bats. *Diversity* **9**, 35 (2017).
- 450 42. Olival, K. J. *et al.* Host and viral traits predict zoonotic spillover from mammals. *Na-*  
451 *ture* **546**, 646–650 (2017).
- 452 43. Streicker, D. G. *et al.* Host phylogeny constrains cross-species emergence and estab-  
453 lishment of rabies virus in bats. *Science* **329**, 676–9 (2010).
- 454 44. Parrish, C. R. *et al.* Cross-species virus transmission and the emergence of new epi-  
455 demic diseases. *Microbiol. Mol. Biol. Rev.* **72**, 457–70 (2008).
- 456 45. Dijkman, R. & van der Hoek, L. Human coronaviruses 229E and NL63: close yet still  
457 so far. *J. Formos. Med. Assoc.* **108**, 270–279 (2009).
- 458 46. Pyrc, K. *et al.* Mosaic structure of human coronavirus NL63, one thousand years of  
459 evolution. *J. Mol. Biol.* **364**, 964–973 (2006).
- 460 47. Pfefferle, S. *et al.* Distant relatives of Severe Acute Respiratory Syndrome coronavirus  
461 and close relatives of human coronavirus 229E in bats, Ghana. *Emerg. Infect. Dis.* **15**,  
462 1377–1384 (2009).
- 463 48. Corman, V. M. *et al.* Evidence for an ancestral association of human coronavirus 229E  
464 with bats. *J. Virol.* **89**, 11858–11870 (2015).
- 465 49. Joffrin, L., Dietrich, M., Mavingui, P. & Lebarbenchon, C. Bat pathogens hit the road:  
466 But which one? *PLoS Pathog.* **14**, e1007134 (2018).
- 467 50. El-Duah, P. *et al.* Development of a whole-virus ELISA for serological evaluation of  
468 domestic livestock as possible hosts of human coronavirus NL63. *Viruses* **11**,  
469 v11010043 (2019).
- 470 51. Huynh, J. *et al.* Evidence supporting a zoonotic origin of human coronavirus strain

- 471 NL63. *J. Virol.* **86**, 12816–25 (2012).
- 472 52. Geldenhuys, M. *et al.* A metagenomic viral discovery approach identifies potential zo-  
473 onotic and novel mammalian viruses in *Neoromicia* bats within South Africa. *PLoS*  
474 *One* **13**, e0194527 (2018).
- 475 53. Chen, L., Liu, B., Yang, J. & Jin, Q. DBatVir: The database of bat-associated viruses.  
476 *Database* **2014**, bau021 (2014).
- 477 54. Wilkinson, D. A. *et al.* Identification of novel paramyxoviruses in insectivorous bats of  
478 the Southwest Indian Ocean. *Virus Res.* **170**, 159–163 (2012).
- 479 55. Wilkinson, D. A. *et al.* Highly diverse morbillivirus-related paramyxoviruses in wild  
480 fauna of the Southwestern Indian Ocean islands: evidence of exchange between intro-  
481 duced and endemic small mammals. *J. Virol.* **88**, 8268–77 (2014).
- 482 56. Gomard, Y. *et al.* Malagasy bats shelter a considerable genetic diversity of pathogenic  
483 *Leptospira* suggesting notable host-specificity patterns. *FEMS Microbiol. Ecol.* **92**,  
484 fiw037 (2016).
- 485 57. Mélade, J. *et al.* An eco-epidemiological study of Morbilli-related paramyxovirus in-  
486 fection in Madagascar bats reveals host-switching as the dominant macro-evolutionary  
487 mechanism. *Sci. Rep.* **6**, (2016).
- 488 58. Lebarbenchon, C. *et al.* Astroviruses in bats, Madagascar. *Emerg. Microbes Infect.* **6**,  
489 e58 (2017).
- 490 59. Muradrasoli, S. *et al.* Broadly targeted multiprobe QPCR for detection of corona-  
491 viruses: coronavirus is common among mallard ducks (*Anas platyrhynchos*). *J. Virol.*  
492 *Methods* **159**, 277–287 (2009).
- 493 60. Poon, L. L. M. *et al.* Identification of a novel coronavirus in bats. *J. Virol.* **79**, 2001–9  
494 (2005).

- 495 61. R Core Team. R: A language and environment for statistical computing. R Foundation  
496 for Statistical Computing, Vienna, Austria. (2018).
- 497 62. Technelysium Pty. Ltd. Chromas Lite Software. (2018).
- 498 63. Grant, B. J., Rodrigues, A. P. C., ElSawy, K. M., McCammon, J. A. & Caves, L. S. D.  
499 Bio3d: an R package for the comparative analysis of protein structures. *Bioinformatics*  
500 **22**, 2695–2696 (2006).
- 501 64. Kumar, S., Stecher, G., Li, M., Knyaz, C. & Tamura, K. MEGA X: Molecular Evolu-  
502 tionary Genetics Analysis across Computing Platforms. *Mol. Biol. Evol.* **35**, 1547–1549  
503 (2018).
- 504 65. Keane, T. M., Creevey, C. J., Pentony, M. M., Naughton, T. J. & McInerney, J. O. As-  
505 sessment of methods for amino acid matrix selection and their use on empirical data  
506 shows that ad hoc assumptions for choice of matrix are not justified. *BMC Evol. Biol.*  
507 **6**, 29 (2006).
- 508 66. QIAGEN. CLC Sequence Viewer 8. (2018).
- 509 67. Paradis, E. & Schliep, K. ape 5.0: an environment for modern phylogenetics and evolu-  
510 tionary analyses in R. *Bioinformatics* **35**, 526–528 (2018).
- 511 68. Legendre, P., Desdevises, Y. & Bazin, E. A Statistical test for host-parasite coevolu-  
512 tion. *Syst. Biol.* **51**, 217–234 (2002).
- 513 69. Conow, C., Fielder, D., Ovadia, Y. & Libeskind-Hadas, R. Jane: a new tool for the  
514 cophylogeny reconstruction problem. *Algorithms Mol. Biol.* **5**, 16 (2010).
- 515

516 **Figures**

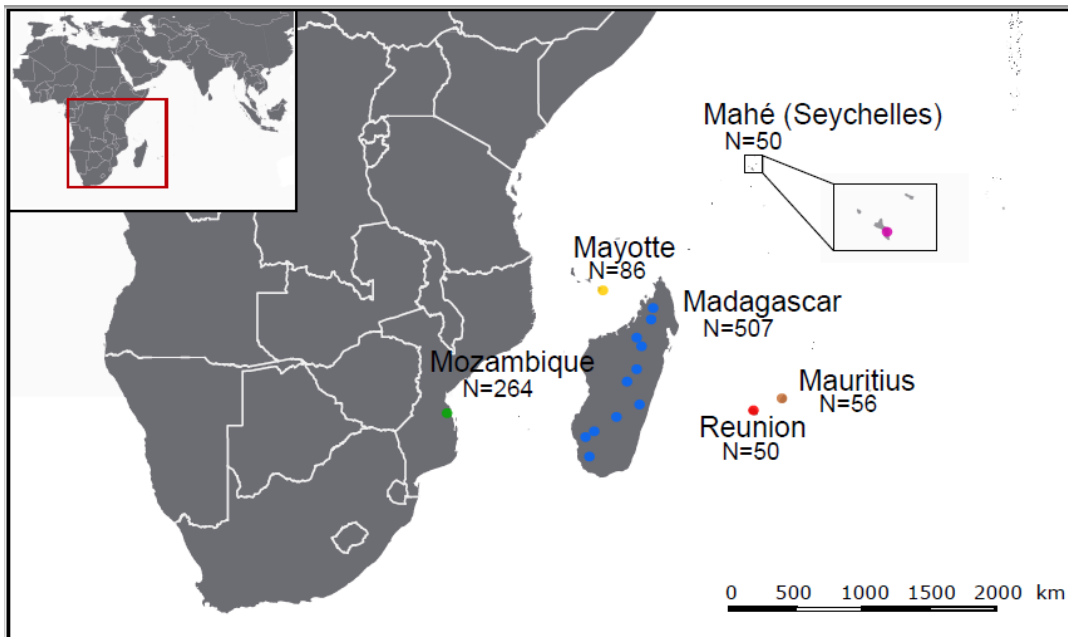

518 **Figure 1.** Geographic distribution of the tested samples. N: number of bats sampled for each  
519 location. The open-source GIS software, QGIS v.3.6.1, was used to generate the map.  
520 <http://qgis.osgeo.org> (2019).

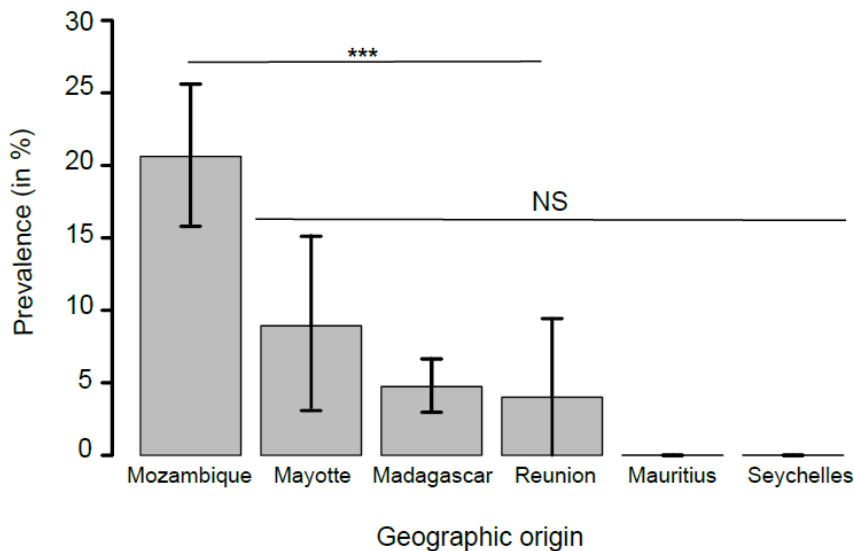

522 **Figure 2.** Mean CoV prevalence ( $\pm$  95% confidence interval) in bats in the Western Indian  
523 Ocean. Pairwise test; \*\*\*:  $p < 0.001$ ; NS:  $p > 0.05$ , not significant.

524

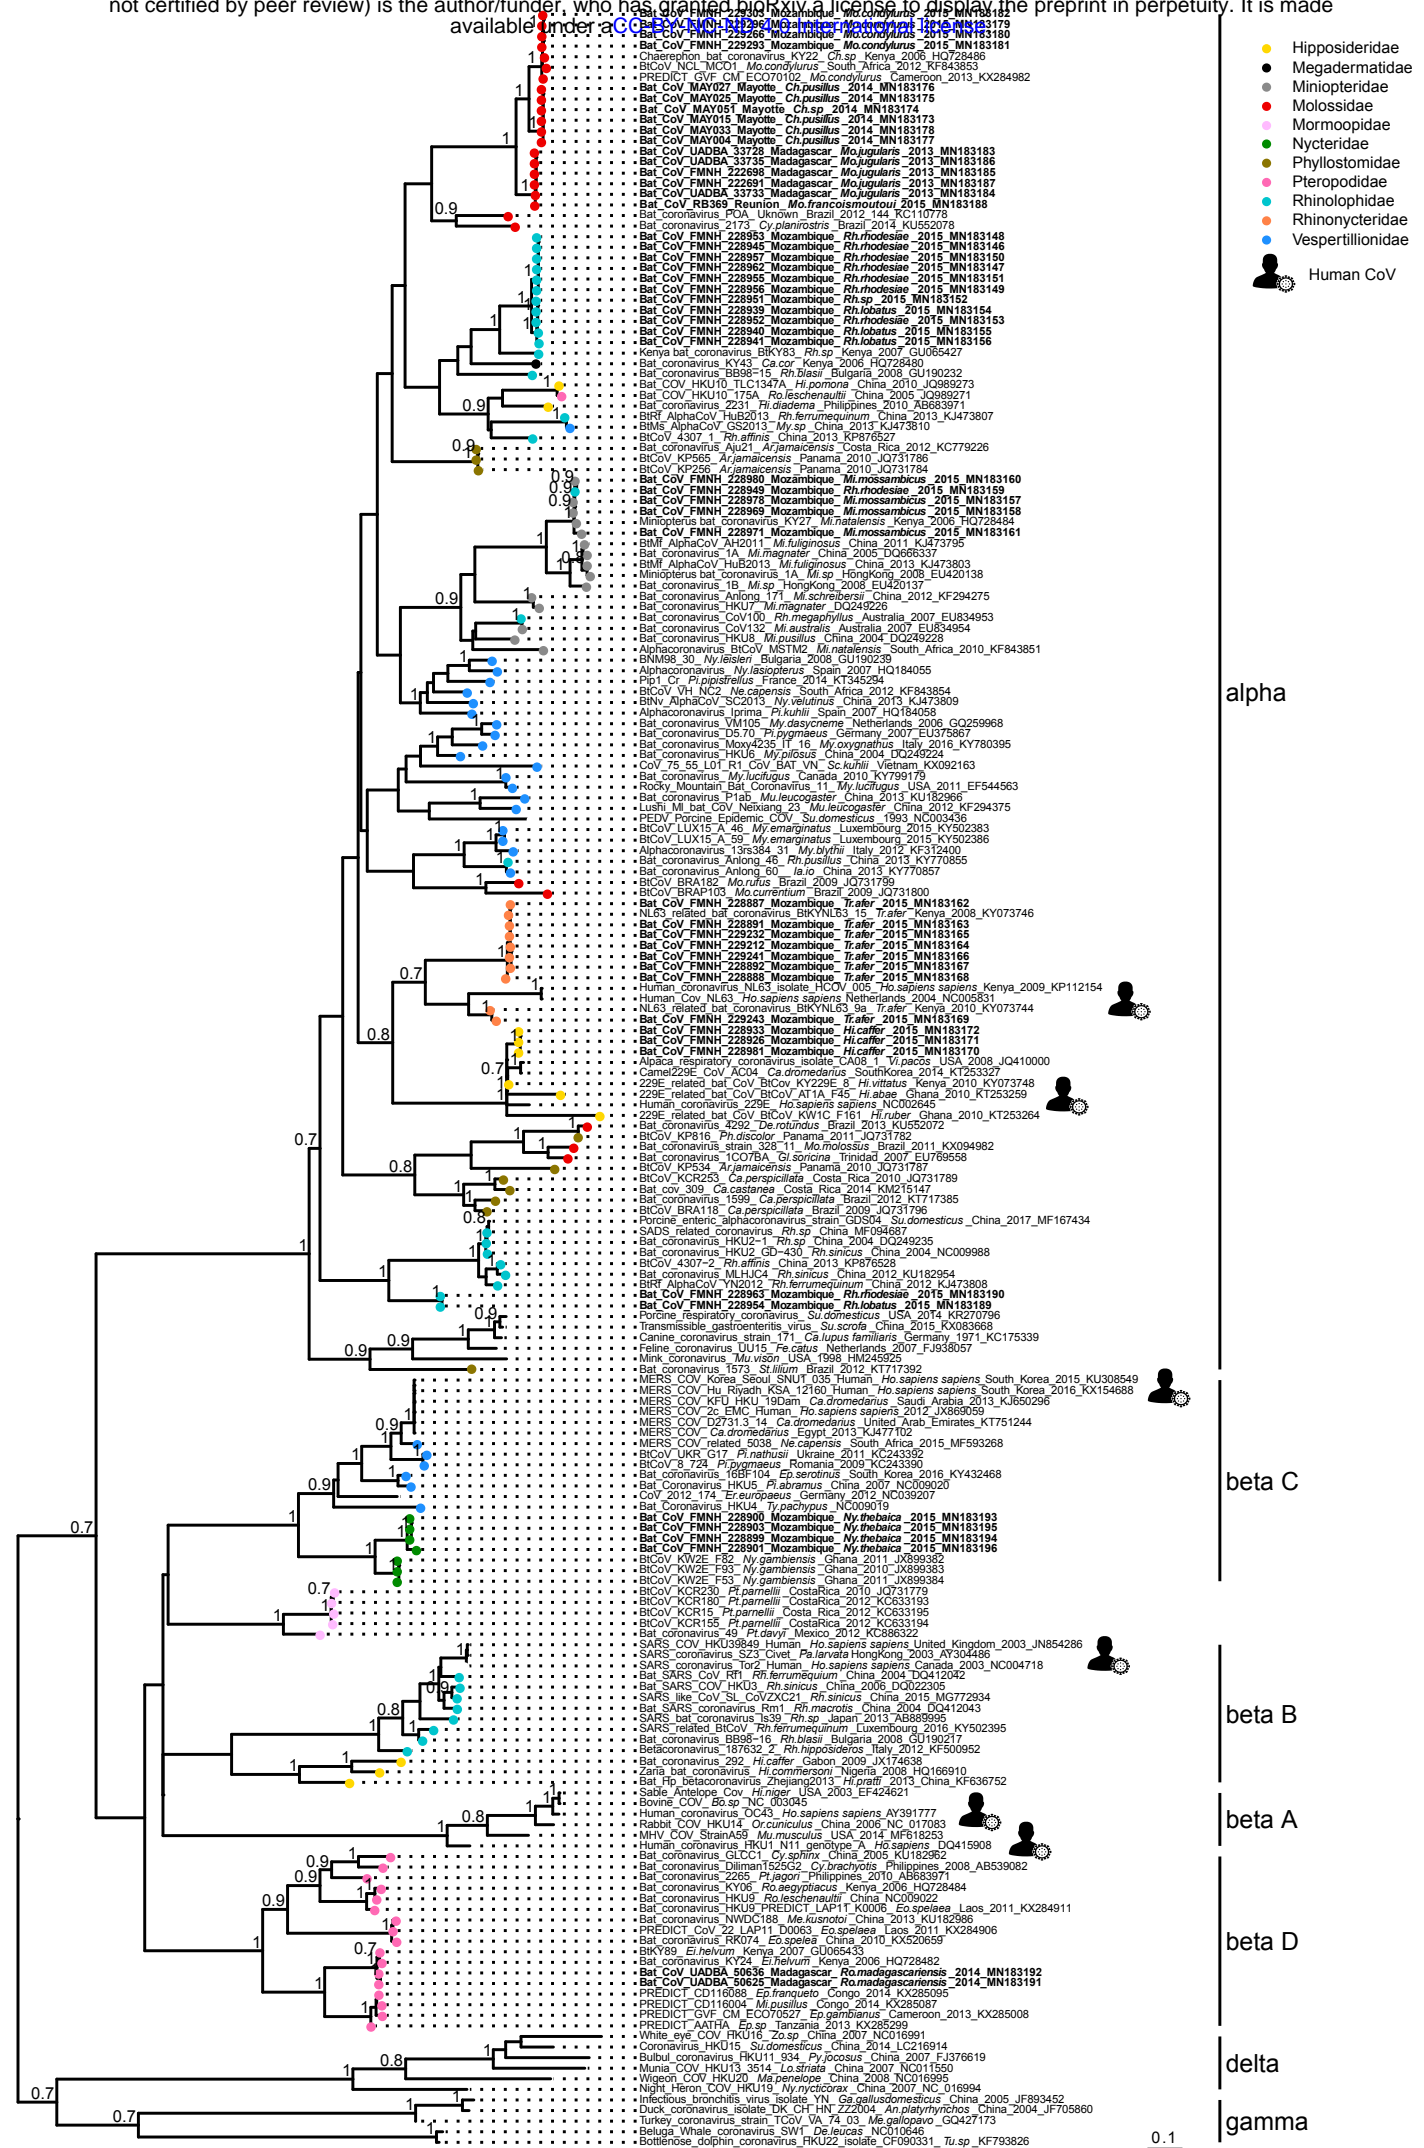



526 **Figure 3.** Maximum Likelihood (ML) consensus tree derived from 202 coronavirus (CoV)  
 527 RNA-dependent RNA-polymerase partial nucleotide sequences (393 bp). Colored circles at the  
 528 end of branches indicate bat family origin. Sequences in bold refer to bat CoVs detected in this  
 529 study. Bootstrap values >0.7 are indicated on the tree. Scale bar indicates mean number of nu-  
 530 cleotide substitutions per site. The tree was generated with the General Time Reversible evolu-  
 531 tionary model (GTR+I+ $\Gamma$ , I = 0.18,  $\alpha$  = 0.64) and 1,000 bootstrap replicates.

532

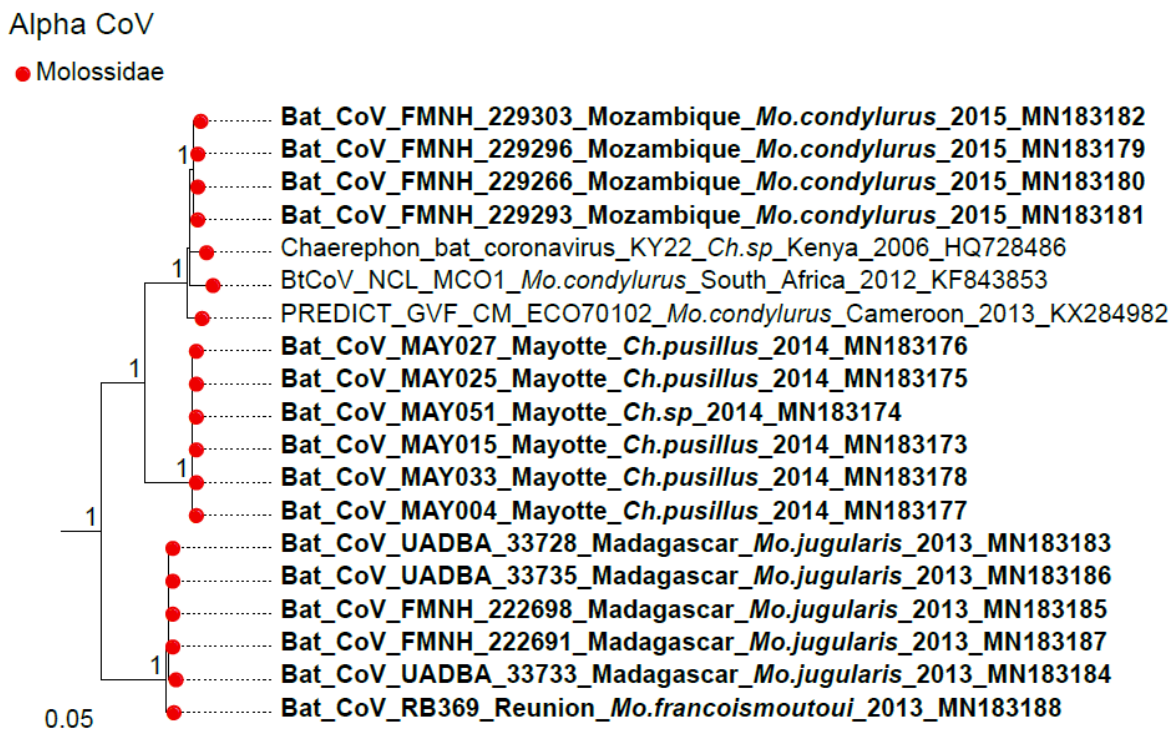

533 **Figure 4.** Detail of the  $\alpha$ -CoV clade. Molossidae CoVs generated in the study are indicated in  
 534 bold. This sub-tree is a zoom on Molossidae CoV clade from the tree depicted in Figure 3. Boot-  
 535 strap values >0.7 are indicated on the tree. Scale bar indicates mean number of nucleotide sub-  
 536 stitutions per site.

537

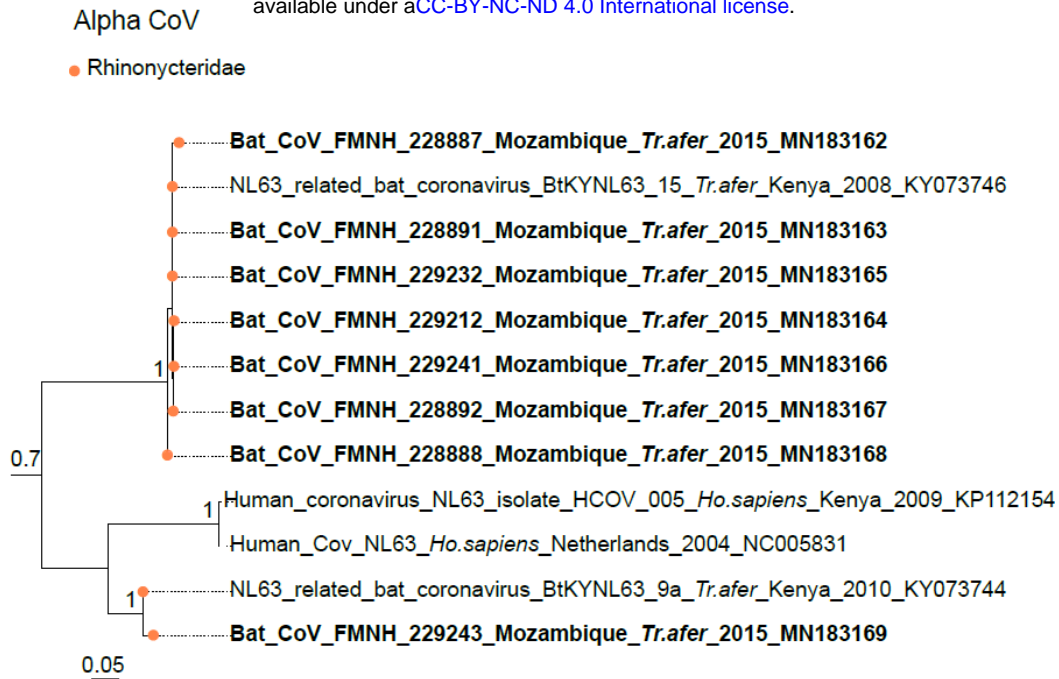

538 **Figure 5.** Detail of the  $\alpha$ -CoV clade. NL63-like CoVs generated in the study are indicated in  
 539 bold. This sub-tree is a zoom on NL63 CoV clade from the tree depicted in Figure 3. Only  
 540 bootstrap values  $>0.7$  are indicated on the tree. Scale bar indicates mean number of nucleotide  
 541 substitutions per site.

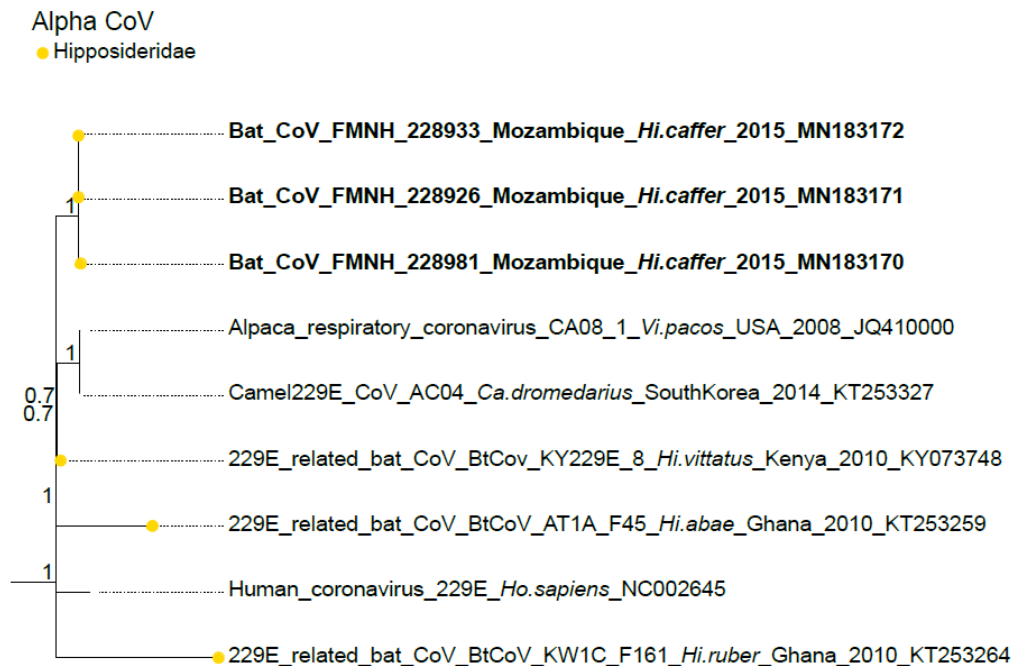

542 **Figure 6.** Detail of the  $\alpha$ -CoV clade. 229E-like CoVs generated in the study are indicated in  
 543 bold. This sub-tree is a zoom on NL63 CoV clade from the tree depicted in Figure 3. Bootstrap  
 544 values  $>0.7$  are indicated on the tree. Scale bar indicates mean number of nucleotide substitu-  
 545 tions per site.

546

### Beta-C CoV

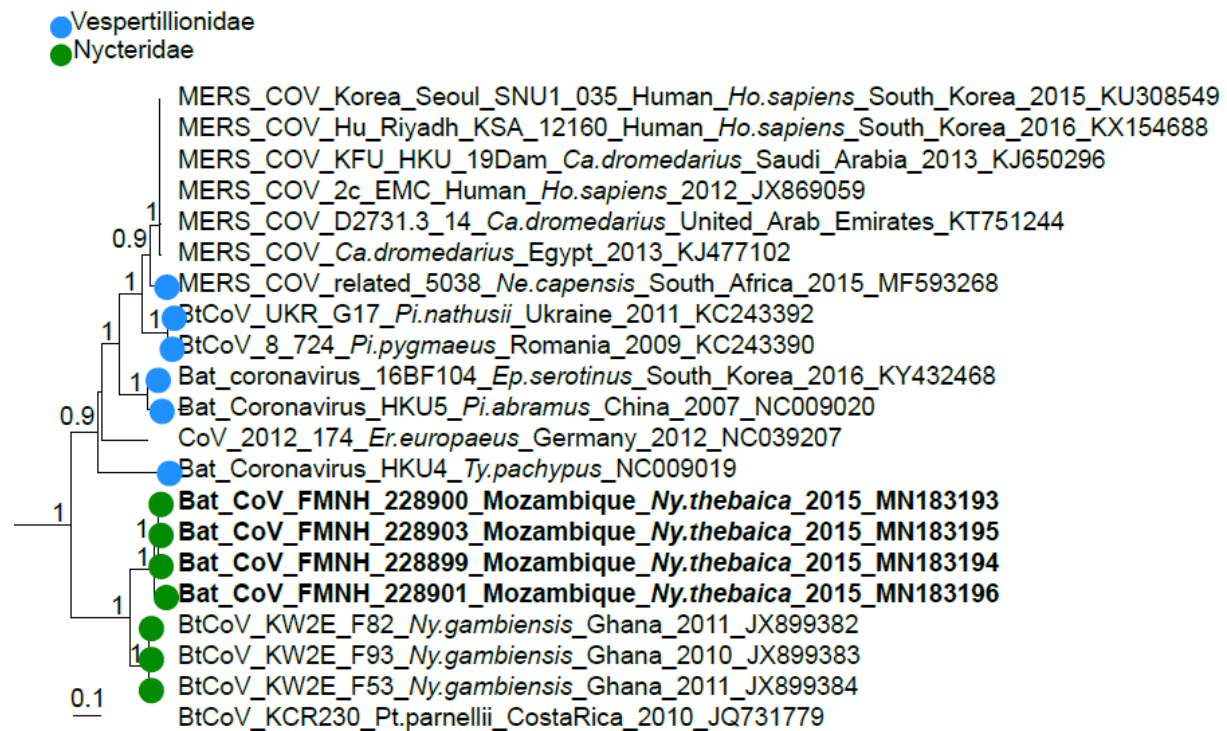

547 **Figure 7.** Detail of the  $\beta$ -C CoV clade. CoVs generated in the study are indicated in bold. This  
548 sub-tree is a zoom on  $\beta$ -C CoV clade from the tree depicted in Figure 3. Bootstrap values  $>0.7$   
549 are indicated on the tree. Scale bar indicates mean number of nucleotide substitutions per site.

### Beta-D CoV

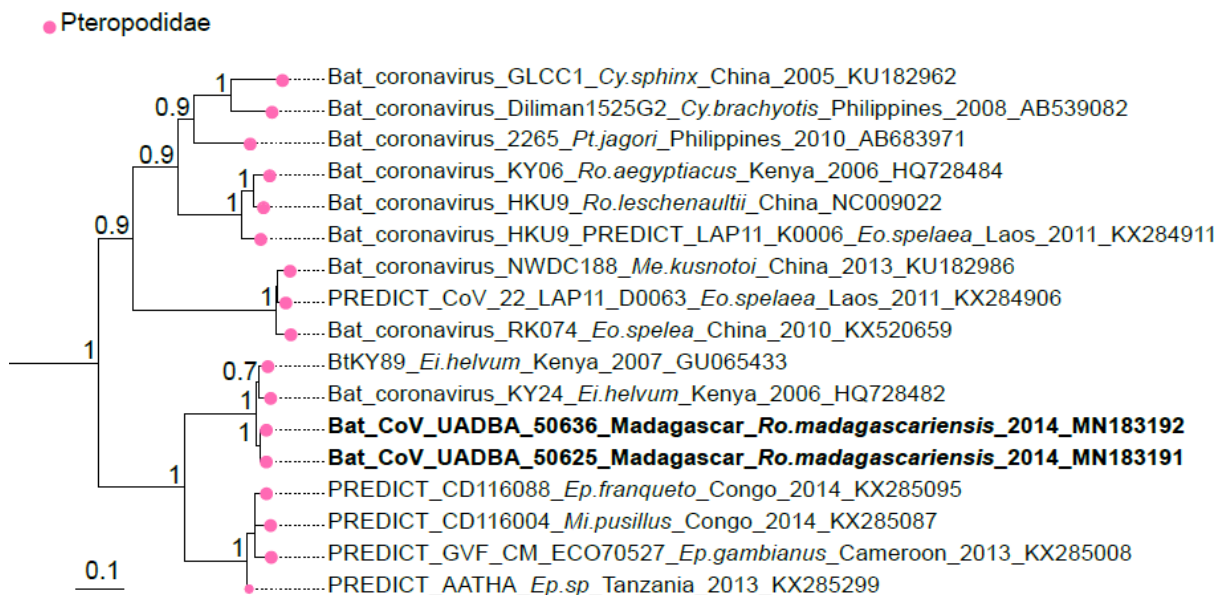

550  
551 **Figure 8.** Detail of the  $\beta$ -D CoV. CoVs generated in the study are indicated in bold. This sub-  
552 tree is a zoom on  $\beta$ -D CoV clade from the tree depicted in Figure 3. Bootstrap values  $>0.7$  are  
553 indicated on the tree. Scale bar indicates mean number of nucleotide substitutions per site.

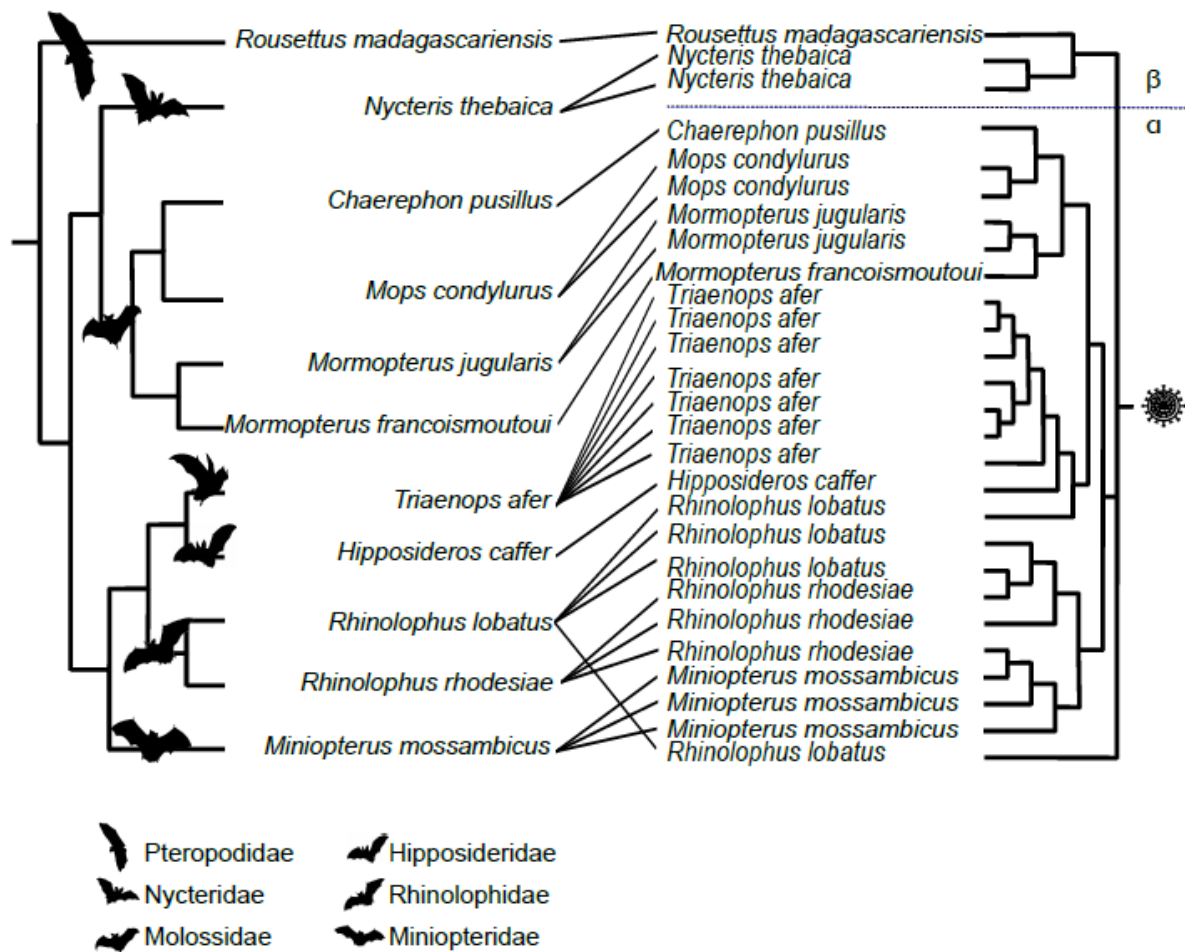

Source: https://www.biorxiv.org/content/10.1101/742866v2.full.pdf
